# Supplementary material
Source: Springer Nature journal article supplement (https://www.springermedizin.de/resource/supplementary/12885_2013_4826_MOESM1_ESM.pdf/9467472)

**A**

*ALDH1*

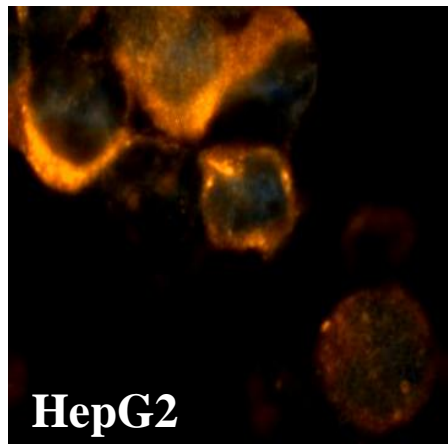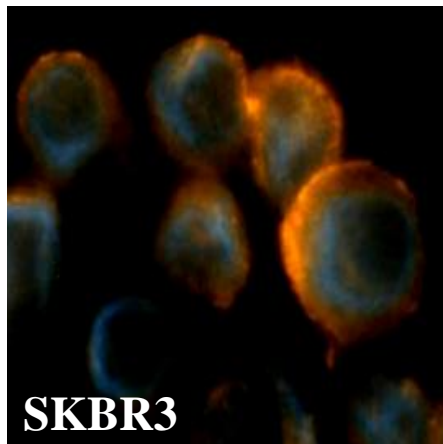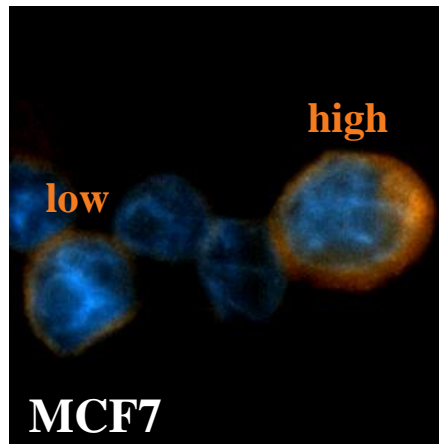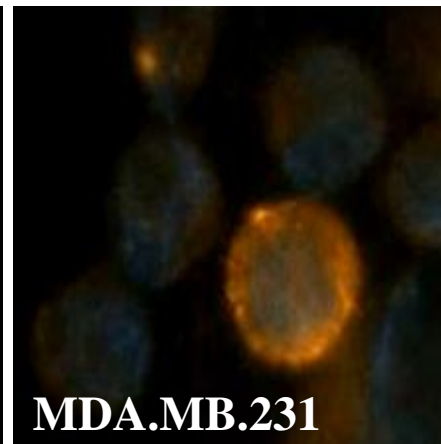

**B**

*TWIST*

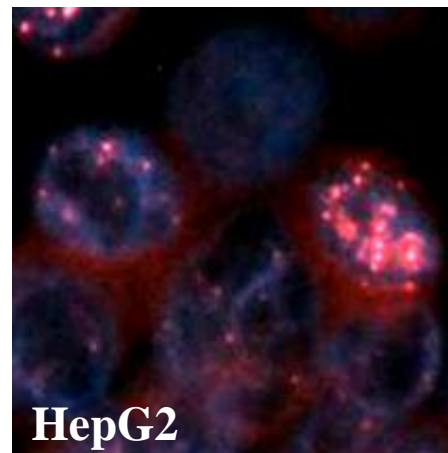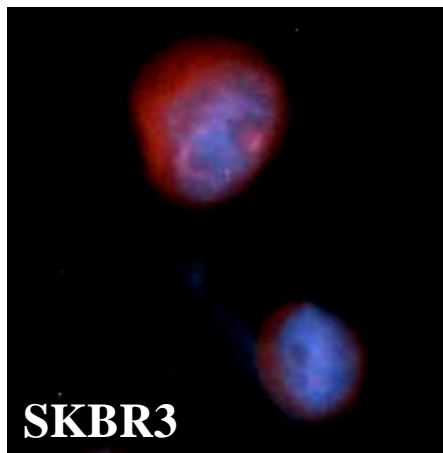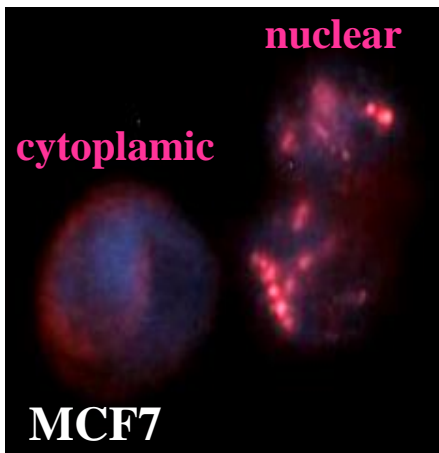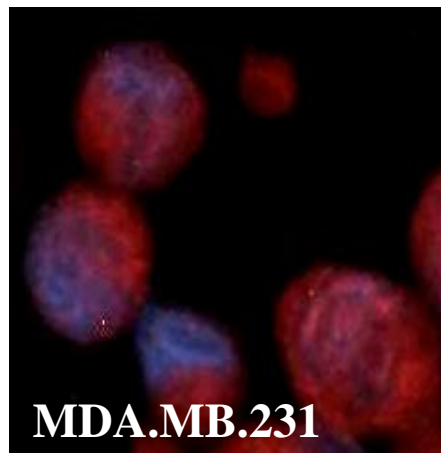

Supplement: MOESM1 [file 9467472]
